# Supplementary material for: Engineering the surface of titanium to improve its bioactivity and antibacterial activity through a multi-functional coating approach
Source: Royal Society of Chemistry journal article supplement (doi:10.1039/d2nj04485d), 2023-01-01
Supplement: d2nj04485d1.pdf [file d2nj04485d1.pdf]

## Supporting Information

### Engineering the surface of titanium to improve its bioactivity and antibacterial activity through a multi-functional coating approach

S. A. Iyoon Jariya<sup>a</sup>, N. Manivannan<sup>b</sup>, B. Mohamad Ali<sup>c</sup>,  
T. S. N. Sankara Narayanan<sup>a,d</sup> and K. Ravichandran<sup>a\*</sup>

<sup>a</sup>Department of Analytical Chemistry, University of Madras,  
Guindy Campus, Chennai-600025, India.

<sup>b</sup>Department of Microbiology, Saveetha Medical College and Hospital, Chennai-602105,  
Tamil Nadu, India.

<sup>c</sup>Department of Chemistry, Saveetha Engineering College, Chennai-602105, Tamil Nadu,  
India.

<sup>d</sup>Ulsan National Institute of Science and Technology (UNIST)  
50 UNIST-gil, Ulsan, Republic of Korea.

### *Synthesis of graphene oxide (GO), reduced graphene oxide (rGO) and silver functionalized reduced graphene oxide (Ag-rGO)*

Graphite oxide was synthesized by modified Hummers' method with some improvements. Briefly, 1 g of graphite powder (particle diameter  $\leq 40$  mm, Sigma Aldrich), 0.75 g of NaNO<sub>3</sub> and 69 mL of H<sub>2</sub>SO<sub>4</sub> were mixed in a beaker and kept in ice bath (0 °C). Then, 5 g of KMnO<sub>4</sub> was added to this mixture in a stepwise manner. After the complete addition of KMnO<sub>4</sub>, the mixture was stirred at 35 °C for 24 h to ensure the complete oxidation of graphite. Next, 100 mL of water was added to the brownish grey paste and the temperature was kept at 95 °C for 15 min. Finally, 175 mL of deionized water and 10 mL of 30 % H<sub>2</sub>O<sub>2</sub> were added to reduce the residual permanganate and the suspension turned to yellowish brown in colour. The solution was allowed to settle down overnight and washed with 5 % HCl and deionized water, respectively, until the pH of the solution becomes neutral. The product was separated using centrifugation at 4000 rpm and the collected product was dried at 60 °C for 24 h in a vacuum oven to finally get graphite oxide (GO).

To synthesize silver functionalized reduced graphene oxide (Ag-rGO), GO (0.5 wt. %) was dispersed in deionized water. Further, 0.25 wt. % of AgNO<sub>3</sub> was added to the GO dispersion and the mixture was stirred well followed by sonication for 1 h. Subsequently, 5 ml of 50-60% hydrazine hydrate was added and the mixture was refluxed at 70 °C for 6 h. The AgrGO was filtered, washed with deionized water and dried at 60 °C for 12 h in a vacuum oven. For preparing pure rGO, the same procedure was performed in the absence of AgNO<sub>3</sub>.

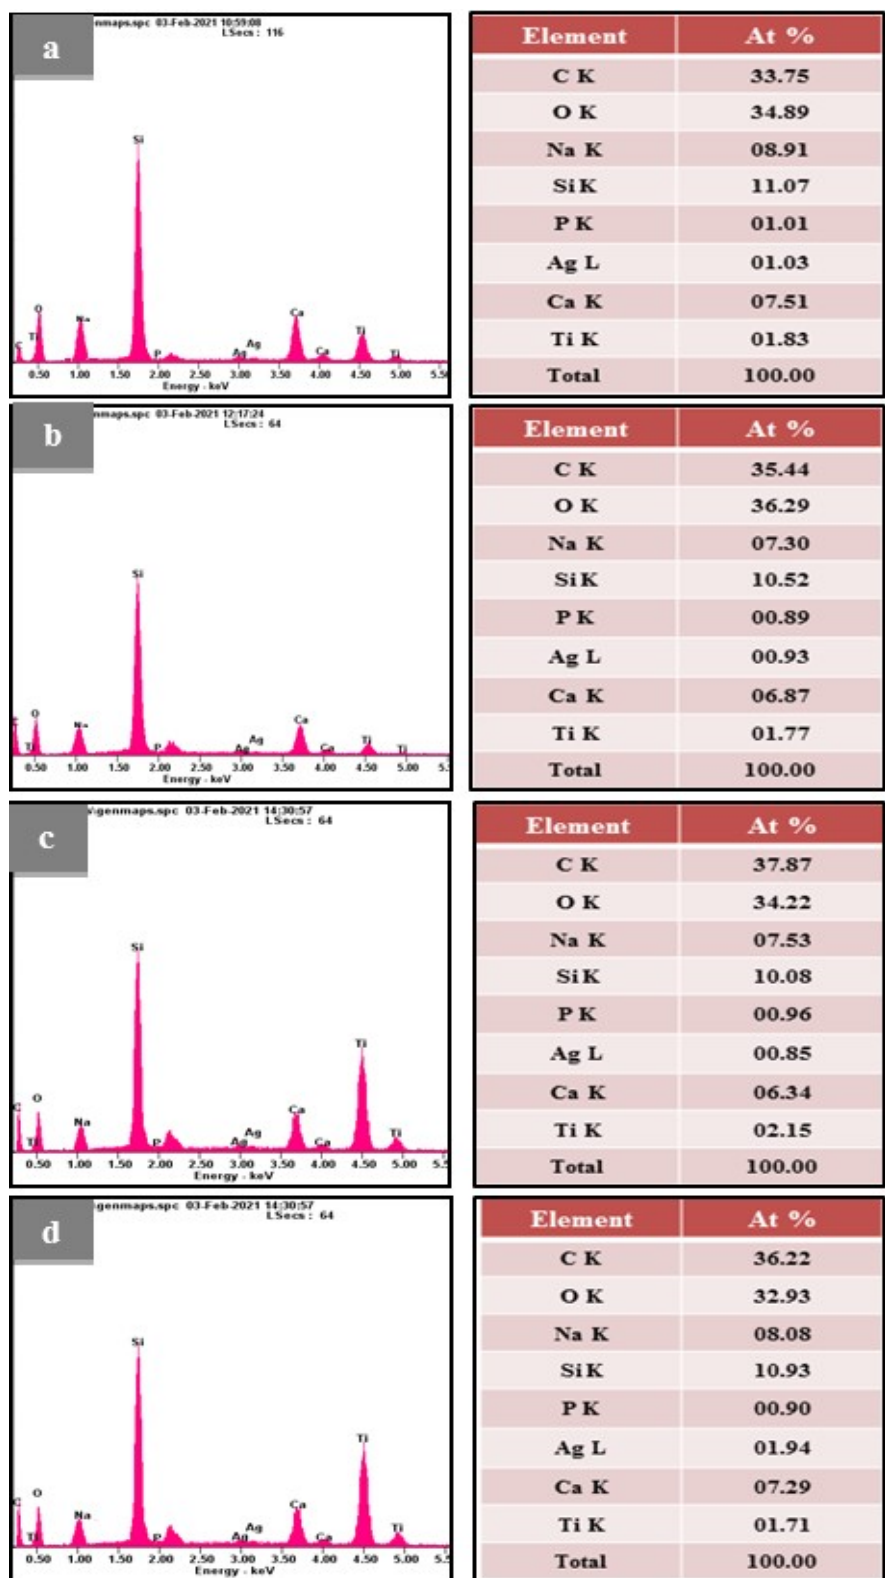

**Fig. S1** EDS spectra and elemental composition of: (a) AgBG/PCL; (b) AgBG-GO/PCL; (c) AgBG-rGO/PCL and (d) BG-AgrGO/PCL composite coatings deposited over TNT-Ti.

**Table S1:** Minimum Inhibitory Concentration (MIC) of AgBG, AgBG-GO, AgBG-rGO and BG-AgrGO composites against *S. aureus* and *E. coli* incubated at 37°C for 16 h.

| Sample Name      | Minimum Inhibitory Concentration (MIC) (mg/L) |                         |
|------------------|-----------------------------------------------|-------------------------|
|                  | Gram-positive bacterium                       | Gram-negative bacterium |
|                  | <i>S. aureus</i>                              | <i>E. coli</i>          |
| AgBG             | 32                                            | 32                      |
| AgBG-GO          | 16                                            | 16                      |
| AgBG-rGO         | 32                                            | 16                      |
| BG-AgrGO         | 64                                            | 32                      |
| BG               | Not determined                                | Not determined          |
| Positive control | 4                                             | 2                       |

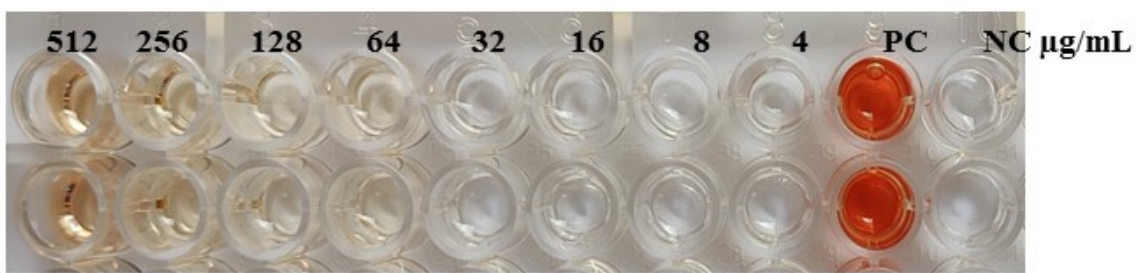

**AgBG**

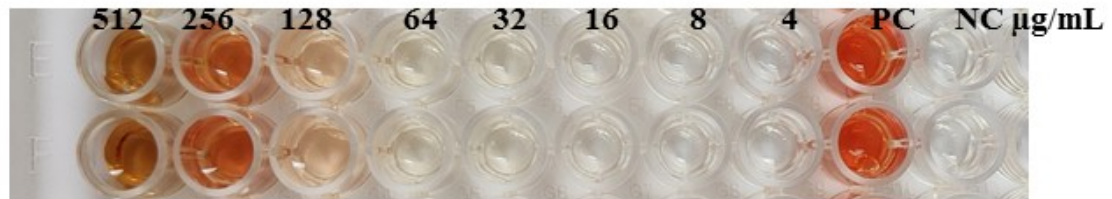

**AgBG-GO**

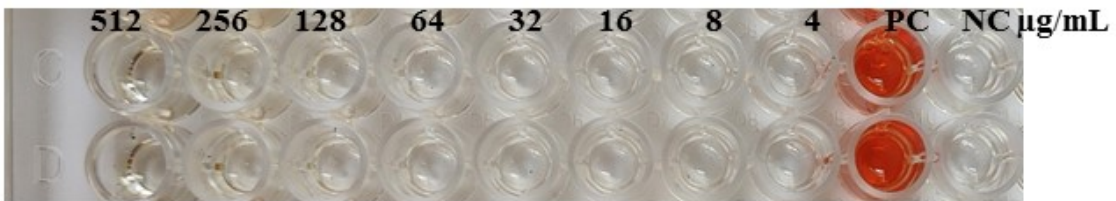

**BG-AgrGO**

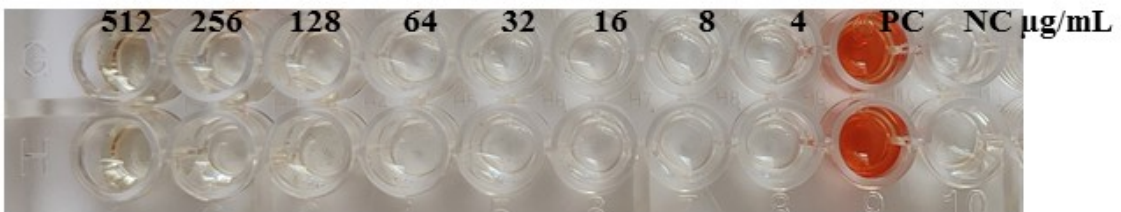

**AgBG-rGO**

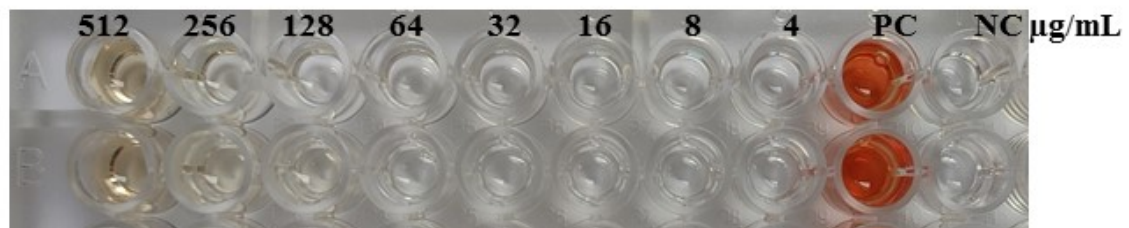

**BG**

**Fig. S2** Hemolytic activity of BG, AgBG, AgBG-GO, AgBG-rGO and BG-AgrGO composites at various concentrations incubated for 1 h at 37 °C.

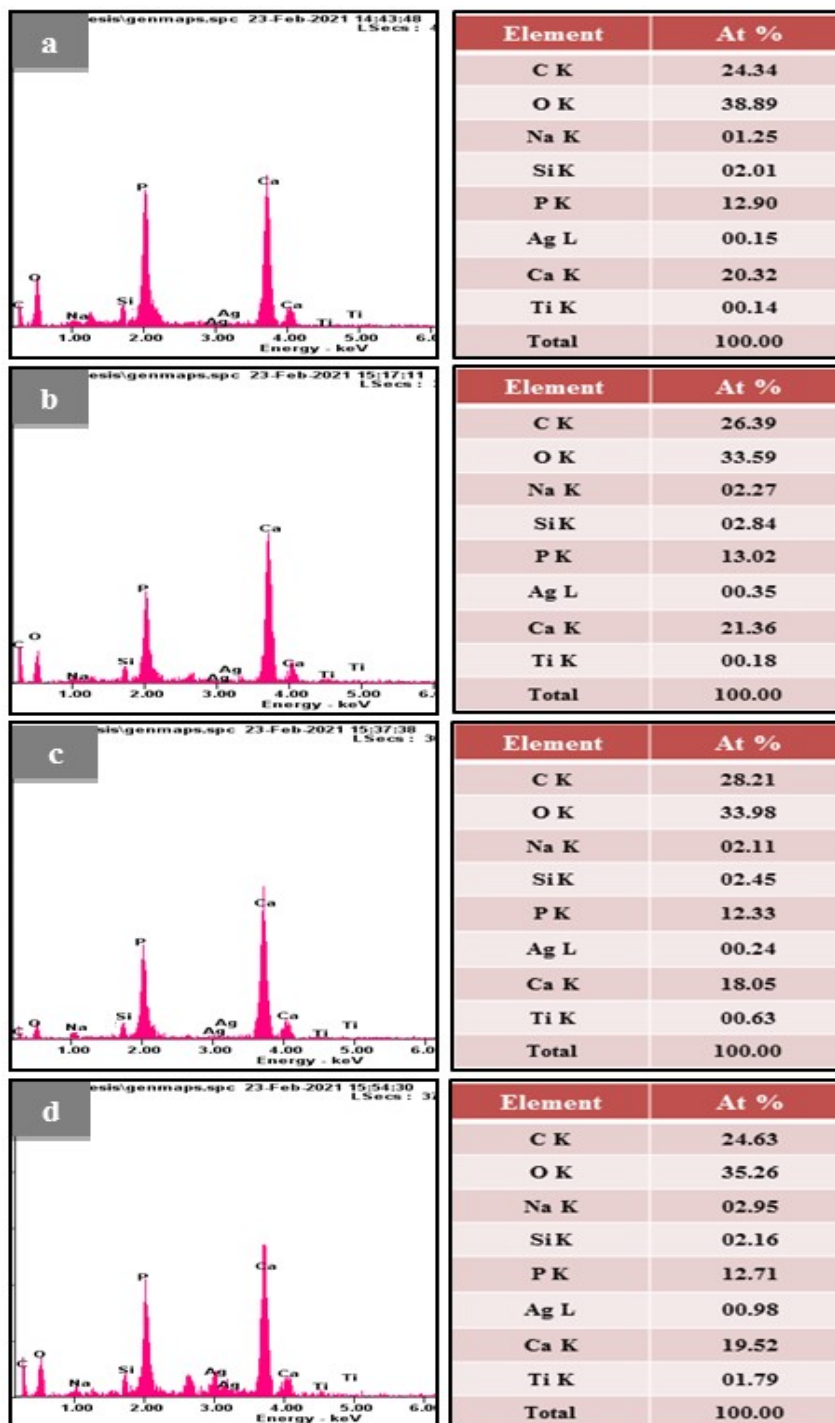

**Fig. S3** EDS spectra and elemental composition of: (a) AgBG/PCL; (b) AgBG-GO/PCL; (c) AgBG-rGO/PCL and (d) BG-AgrGO/PCL composite coatings deposited over TNT-Ti after immersion in SBF at  $37 \pm 1^\circ \text{C}$  for 10 days

**Table S2:** Elemental composition acquired at the surface of AgBG/PCL, AgBG-GO/PCL, AgBG-rGO/PCL and BG-AgrGO/PCL composite coatings deposited over TNT-Ti after immersion in SBF at  $37 \pm 1^\circ \text{C}$  for 10 days

| Elemental composition (at. %) | Type of sample             |                               |                                |                                |
|-------------------------------|----------------------------|-------------------------------|--------------------------------|--------------------------------|
|                               | AgBG/PCL composite coating | AgBG-GO/PCL composite coating | AgBG-rGO/PCL composite coating | BG-AgrGO/PCL composite coating |
| C                             | 24.34                      | 26.39                         | 28.21                          | 24.63                          |
| O                             | 38.89                      | 33.59                         | 35.98                          | 35.26                          |
| Na                            | 01.25                      | 02.27                         | 02.11                          | 02.95                          |
| Si                            | 02.01                      | 02.84                         | 02.45                          | 02.16                          |
| P                             | 12.90                      | 13.02                         | 12.33                          | 12.71                          |
| Ag                            | 00.15                      | 00.35                         | 00.24                          | 00.98                          |
| Ca                            | 20.32                      | 21.36                         | 18.05                          | 19.52                          |
| Ti                            | 00.14                      | 00.18                         | 00.63                          | 01.79                          |
| <b>Elemental ratio Ca/P</b>   | <b>1.57</b>                | <b>1.64</b>                   | <b>1.46</b>                    | <b>1.53</b>                    |

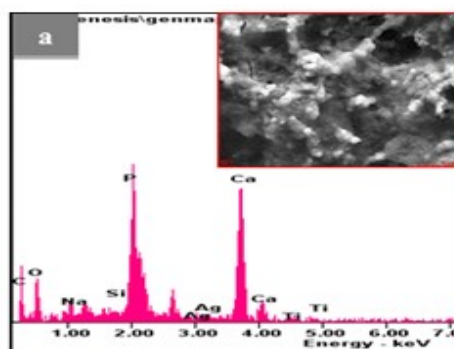

| Element | At %   |
|---------|--------|
| C K     | 33.05  |
| O K     | 37.32  |
| Na K    | 01.69  |
| Si K    | 00.24  |
| P K     | 11.31  |
| Ag L    | 00.19  |
| Ca K    | 15.78  |
| Ti K    | 00.42  |
| Total   | 100.00 |

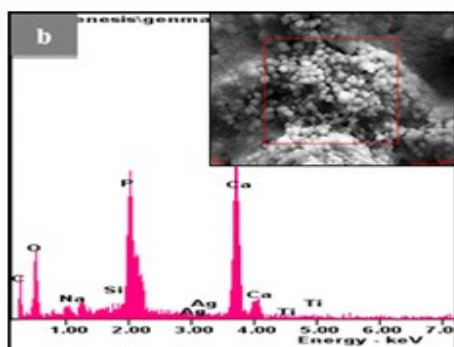

| Element | At %   |
|---------|--------|
| C K     | 32.96  |
| O K     | 35.86  |
| Na K    | 01.40  |
| Si K    | 00.13  |
| P K     | 12.04  |
| Ag L    | 00.16  |
| Ca K    | 17.06  |
| Ti K    | 00.39  |
| Total   | 100.00 |

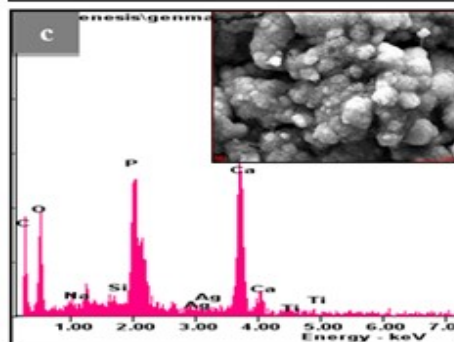

| Element | At %   |
|---------|--------|
| C K     | 34.23  |
| O K     | 36.98  |
| Na K    | 01.58  |
| Si K    | 00.18  |
| P K     | 10.98  |
| Ag L    | 00.24  |
| Ca K    | 15.48  |
| Ti K    | 00.33  |
| Total   | 100.00 |

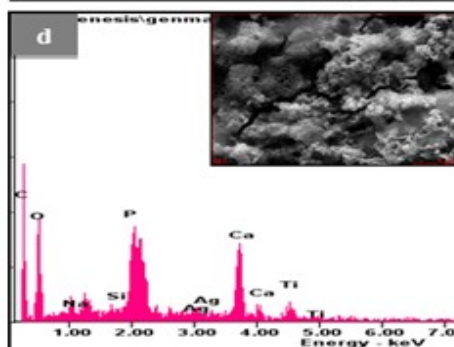

| Element | At %   |
|---------|--------|
| C K     | 33.65  |
| O K     | 35.83  |
| Na K    | 01.63  |
| Si K    | 00.19  |
| P K     | 11.45  |
| Ag L    | 00.63  |
| Ca K    | 16.07  |
| Ti K    | 00.55  |
| Total   | 100.00 |



**Fig. S4** EDS spectra and elemental composition of: (a) AgBG/PCL; (b) AgBG-GO/PCL; (c) AgBG-rGO/PCL and (d) BG-AgrGO/PCL composite coatings deposited over TNT-Ti after immersion in HBSS at  $37 \pm 1^\circ \text{C}$  for 14 days

| Elemental composition (at. %) | Type of sample             |                               |                                |                                |
|-------------------------------|----------------------------|-------------------------------|--------------------------------|--------------------------------|
|                               | AgBG/PCL composite coating | AgBG-GO/PCL composite coating | AgBG-rGO/PCL composite coating | BG-AgrGO/PCL composite coating |
| C                             | 33.05                      | 32.96                         | 34.23                          | 33.65                          |
| O                             | 37.32                      | 35.86                         | 36.98                          | 35.83                          |
| Na                            | 01.69                      | 01.40                         | 01.58                          | 01.63                          |
| Si                            | 00.24                      | 00.13                         | 00.18                          | 00.19                          |
| P                             | 11.31                      | 12.04                         | 10.98                          | 11.45                          |
| Ag                            | 00.19                      | 00.16                         | 00.24                          | 00.63                          |
| Ca                            | 15.78                      | 17.06                         | 15.48                          | 16.07                          |
| Ti                            | 00.42                      | 00.39                         | 00.33                          | 0.55                           |
| Total                         | 100.00                     | 100.00                        | 100.00                         | 100.00                         |

**Table S3:** Elemental composition acquired at the surface of AgBG/PCL, AgBG-GO/PCL, AgBG-rGO/PCL and BG-AgrGO/PCL composite coatings deposited over TNT-Ti after immersion in HBSS at  $37 \pm 1^\circ \text{C}$  for 14 days
